# Supplementary material
Source: PubMed Central journal article supplement (PMC3243069)
Supplement: NIHMS340689-supplement-01.pdf [file NIHMS340689-supplement-01.pdf]

Supplementary Table 1A. Hemagglutination inhibition test of 20 immunized human sera to seasonal H1N1 viruses

| Strain name      | NA<br>(275) | Immunized human sera |      |     |     |     |     |     |     |     |      |      |      |      |      |      |      |      |      |      |      |     |
|------------------|-------------|----------------------|------|-----|-----|-----|-----|-----|-----|-----|------|------|------|------|------|------|------|------|------|------|------|-----|
|                  |             | HS1                  | HS2  | HS3 | HS4 | HS5 | HS6 | HS7 | HS8 | HS9 | HS10 | HS11 | HS12 | HS13 | HS14 | HS15 | HS16 | HS17 | HS18 | HS19 | HS20 |     |
| Brisbane/59/2007 |             | 40                   | 640  | 160 | 160 | 80  | 80  | 40  | 80  | 320 | 160  | 160  | 40   | 40   | 10   | 80   | 40   | 640  | 40   | 160  | 320  |     |
| HK/04633/2008    |             | 320                  | 1280 | 320 | 320 | 40  | 160 | 40  | 320 | 320 | 80   | 320  | 40   | 80   | 10   | 80   | 40   | 640  | 40   | 160  | 320  |     |
| HK/04427/2008    |             | 80                   | 640  | 160 | 160 | 40  | 80  | 40  | 160 | 320 | 80   | 320  | 80   | 40   | 10   | 40   | 40   | 320  | 40   | 160  | 80   |     |
| HK/03807/2008    |             | 320                  | 1280 | 320 | 160 | 40  | 160 | 40  | 320 | 320 | 80   | 320  | 80   | 40   | <    | 80   | 80   | 320  | 80   | 160  | 640  |     |
| HK/01045/2008    | H           | 160                  | 1280 | 160 | 160 | 40  | 160 | 20  | 80  | 160 | 80   | 320  | 40   | 80   | 10   | 80   | 40   | 320  | 40   | 160  | 320  |     |
| HK/01236/2008    |             | 40                   | 40   | 160 | 40  | 20  | 80  | 20  | 80  | 40  | 40   | 320  | 40   | 40   | 10   | 40   | 20   | 40   | 40   | 80   | 160  |     |
| HK/02022/2008    |             | 640                  | 1280 | 640 | 320 | 80  | 320 | 80  | 640 | 640 | 80   | 640  | 40   | 40   | 20   | 160  | 80   | 1280 | 40   | 320  | 1280 |     |
| HK/02181/2008    |             | 320                  | 1280 | 320 | 320 | 40  | 160 | 40  | 320 | 320 | 80   | 320  | 40   | 80   | 10   | 80   | 40   | 640  | 40   | 160  | 320  |     |
| HK/03138/2008    |             | 640                  | 1280 | 320 | 320 | 80  | 320 | 80  | 640 | 640 | 80   | 640  | 80   | 80   | 20   | 160  | 80   | 1280 | 80   | 320  | 1280 |     |
| HK/00995/2008    |             | 160                  | 1280 | 320 | 320 | 80  | 160 | 40  | 320 | 320 | 160  | 320  | 80   | 80   | 20   | 80   | 40   | 640  | 80   | 160  | 320  |     |
| HK/15273/2009    |             |                      | 40   | 40  | 40  | 160 | 20  | 80  | 20  | 40  | 80   | 40   | 40   | 20   | 20   | 10   | 80   | 80   | 640  | 40   | 40   | 40  |
| HK/15411/2009    |             |                      | 160  | 160 | 40  | 320 | 80  | 160 | 40  | 80  | 160  | 80   | 160  | 80   | 40   | 20   | 80   | 80   | 640  | 80   | 80   | 160 |
| HK/16176/2009    |             |                      | 80   | 80  | 80  | 160 | 20  | 160 | 40  | 80  | 80   | 160  | 80   | 80   | 40   | 20   | 80   | 80   | 320  | 80   | 80   | 80  |
| HK/16418/2009    |             |                      | 80   | 80  | 80  | 160 | 80  | 80  | 20  | 80  | 160  | 40   | 80   | 40   | 40   | 10   | 80   | 80   | 640  | 40   | 80   | 160 |
| HK/17270/2009    |             | 40                   | 40   | 40  | 80  | 20  | 40  | 10  | 20  | 40  | 40   | 40   | 40   | 20   | <    | 40   | 40   | 160  | 40   | 20   | 40   |     |
| HK/17566/2009    |             | 160                  | 160  | 80  | 160 | 160 | 80  | 80  | 160 | 160 | 160  | 160  | 80   | 80   | 20   | 80   | 80   | 640  | 80   | 80   | 640  |     |
| HK/62768/2008    |             | 160                  | 80   | 80  | 320 | 80  | 80  | 40  | 40  | 80  | 80   | 80   | 80   | 80   | 20   | 80   | 40   | 640  | 20   | 80   | 320  |     |
| HK/63799/2008    |             | 80                   | 40   | 40  | 80  | 10  | 40  | 20  | 20  | 40  | 40   | 40   | 40   | 40   | 10   | <    | 80   | 320  | 40   | 40   | 160  |     |
| HK/65446/2008    |             | 40                   | 40   | 40  | 80  | 20  | 20  | 20  | 40  | 40  | 20   | 80   | 40   | 40   | 10   | <    | 40   | 160  | 40   | 40   | 160  |     |
| HK/18295/2009    |             | 80                   | 40   | 40  | 160 | 40  | 80  | 20  | 20  | n/a | 80   | 80   | 40   | 40   | 10   | <    | 40   | 640  | 40   | 40   | 40   |     |
| HK/18443/2009    | Y           | 40                   | 20   | <   | 160 | <   | 40  | 10  | 10  | n/a | 80   | 40   | 20   | 20   | <    | <    | 40   | 320  | 20   | 10   | 40   |     |
| HK/23800/2009    |             | 40                   | 40   | 40  | 40  | 20  | 40  | 20  | 40  | n/a | 40   | 80   | 40   | 20   | 10   | <    | 40   | 160  | <    | 20   | 40   |     |
| HK/25119/2009    |             | 160                  | 80   | 80  | 320 | 80  | 80  | 40  | 40  | n/a | 40   | 80   | 80   | 80   | 20   | 80   | 80   | 640  | 40   | 80   | 320  |     |
| HK/32794/2009    |             | 40                   | 80   | <   | 40  | <   | 20  | 20  | 20  | n/a | 40   | <    | 40   | 40   | 10   | <    | 40   | 160  | 40   | 20   | 40   |     |
| HK/33955/2009    |             | 40                   | 40   | <   | 80  | <   | 20  | 20  | 10  | n/a | 40   | 40   | 40   | <    | 10   | <    | 40   | 320  | 20   | 20   | 160  |     |
| HK/45537/2009    |             | 40                   | 40   | 40  | 40  | 20  | 80  | 10  | 20  | n/a | 80   | 40   | 40   | 20   | 10   | <    | 40   | 160  | 20   | 20   | 20   |     |
| HK/46035/2009    |             | 160                  | 40   | 80  | 160 | 160 | 160 | 40  | 80  | n/a | 80   | 160  | 80   | 80   | 20   | <    | 160  | 640  | 40   | 80   | 80   |     |
| HK/64989/2009    |             | 80                   | 40   | 40  | 80  | 40  | 80  | 20  | 40  | n/a | 80   | 80   | 40   | 20   | <    | <    | 40   | 160  | 40   | 40   | 40   |     |
| HK/66641/2009    |             |                      | 20   | 40  | 40  | 40  | 20  | 40  | 20  | 40  | n/a  | 40   | 80   | 40   | 20   | 10   | <    | 40   | 80   | <    | 40   | 40  |
| HK/01078/2009    |             |                      | 80   | 40  | 80  | 80  | 80  | 80  | 20  | 40  | n/a  | 80   | 80   | 40   | 20   | 10   | <    | 40   | 320  | <    | 40   | 40  |

< denoted as titer <10; n/a data were not available.
