# Supplementary material
Source: PubMed Central journal article supplement (PMC3243069)
Supplement: NIHMS340689-supplement-03.pdf [file NIHMS340689-supplement-03.pdf]

**Supplementary Table 2. Comparison of HA sequences from oseltamivir resistant and susceptible 2008-2009 H1N1 virus strains.**

| Strain name            | Accession No. | NA 275 | Residue position (H1 numbering) |          |          |          |          |
|------------------------|---------------|--------|---------------------------------|----------|----------|----------|----------|
|                        |               |        | 141                             | 183      | 185      | 186      | 189      |
| A/Brisbane/59/2007     |               |        | S                               | N        | G        | D        | A        |
| A/Hong Kong/04633/2008 | CY087264      |        | S                               | N        | G        | D        | A        |
| A/Hong Kong/04427/2008 | CY087262      |        | S                               | N        | G        | D        | A        |
| A/Hong Kong/03807/2008 | CY087260      |        | S                               | N        | G        | D        | A        |
| A/Hong Kong/01045/2008 | CY087248      | H      | S                               | N        | G        | D        | A        |
| A/Hong Kong/01085/2008 | CY087250      |        | S                               | N        | G        | D        | A        |
| A/Hong Kong/01236/2008 | CY087252      |        | S                               | N        | G        | D        | A        |
| A/Hong Kong/02022/2008 | CY087254      |        | S                               | N        | G        | D        | A        |
| A/Hong Kong/02181/2008 | CY087256      |        | S                               | N        | G        | D        | A        |
| A/Hong Kong/03138/2008 | CY087258      |        | S                               | N        | G        | D        | A        |
| A/Hong Kong/15273/2009 | CY087266      |        | <b>K</b>                        | N        | <b>A</b> | D        | <b>T</b> |
| A/Hong Kong/15411/2009 | CY087268      |        | <b>N</b>                        | N        | <b>A</b> | D        | <b>T</b> |
| A/Hong Kong/16176/2009 | CY087270      |        | <b>N</b>                        | N        | <b>A</b> | D        | <b>T</b> |
| A/Hong Kong/16418/2009 | CY087272      |        | <b>N</b>                        | N        | <b>A</b> | D        | <b>T</b> |
| A/Hong Kong/17270/2009 | CY087274      |        | <b>N</b>                        | N        | <b>A</b> | <b>N</b> | <b>T</b> |
| A/Hong Kong/17566/2009 | CY087276      |        | S                               | N        | G        | D        | <b>T</b> |
| A/Hong Kong/62768/2008 | CY087278      |        | S                               | <b>S</b> | <b>N</b> | D        | <b>T</b> |
| A/Hong Kong/63799/2008 | CY087280      |        | S                               | <b>S</b> | <b>S</b> | D        | <b>T</b> |
| A/Hong Kong/65446/2008 | CY087284      |        | S                               | <b>S</b> | <b>S</b> | D        | <b>T</b> |
| A/Hong Kong/65101/2008 | CY087282      |        | <b>N</b>                        | N        | <b>A</b> | <b>N</b> | <b>T</b> |
| A/Hong Kong/18295/2009 | CY099317      |        | <b>N</b>                        | N        | <b>A</b> | <b>N</b> | <b>T</b> |
| A/Hong Kong/18443/2009 | CY099318      | Y      | <b>N</b>                        | N        | <b>A</b> | <b>V</b> | <b>T</b> |
| A/Hong Kong/23800/2009 | CY099319      |        | <b>N</b>                        | N        | <b>A</b> | D        | <b>T</b> |
| A/Hong Kong/25119/2009 | CY099320      |        | S                               | <b>S</b> | <b>S</b> | D        | <b>T</b> |
| A/Hong Kong/32794/2009 | CY099321      |        | S                               | N        | <b>V</b> | D        | <b>T</b> |
| A/Hong Kong/33955/2009 | CY099322      |        | S                               | <b>S</b> | <b>S</b> | D        | <b>T</b> |
| A/Hong Kong/45537/2009 | CY099323      |        | <b>N</b>                        | N        | <b>A</b> | <b>N</b> | <b>T</b> |
| A/Hong Kong/46035/2009 | CY099324      |        | <b>N</b>                        | N        | <b>A</b> | D        | <b>T</b> |
| A/Hong Kong/64989/2009 | CY099325      |        | <b>N</b>                        | N        | <b>A</b> | D        | <b>T</b> |
| A/Hong Kong/66641/2009 | CY099326      |        | <b>N</b>                        | N        | <b>A</b> | D        | <b>T</b> |
| A/Hong Kong/01078/2009 | CY099315      |        | <b>N</b>                        | N        | <b>A</b> | D        | <b>T</b> |
| A/Hong Kong/02701/2009 | CY099316      |        | <b>N</b>                        | N        | <b>A</b> | D        | <b>T</b> |

**Note.**

Boldface font indicates residues which differ from the A/Brisbane/59/2007 sequence
